# Supplementary material
Source: Springer Nature journal article supplement (https://www.springermedizin.de/resource/supplementary/12887_2013_987_MOESM3_ESM.pdf/9476868)

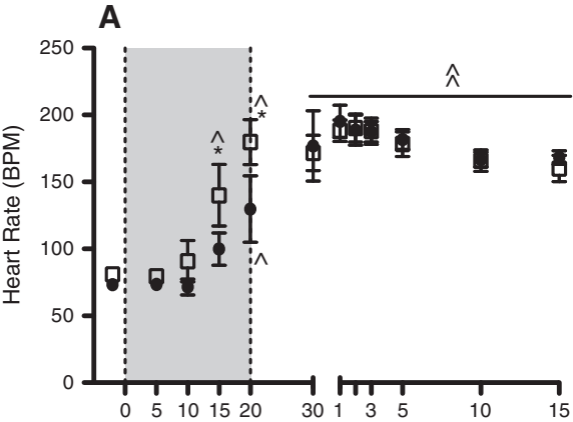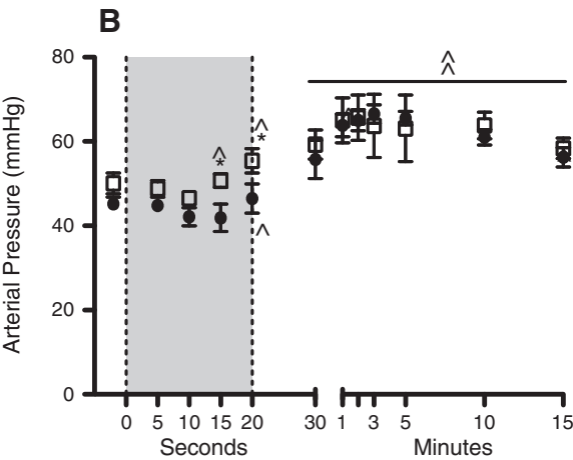

Supplement: MOESM3 [file 9476868]
